# Supplementary material for: A Brief Clinical Tool to Estimate Individual Patients’ Risk of Depressive Relapse Following Remission: Proof of Concept
Source: Atypon-hosted journal article supplement (doi:10.1176/appi.ajp.2016.15111462), 2016-07-15
Supplement: appi.ajp.2016.15111462.ds001.pdf [file appi.ajp.2016.15111462.ds001.pdf]

**TABLE S1. “Clinically Actionable” Ranges of Number of Selected SCL-90 Items<sup>a</sup> Experienced at a Moderate or Worse Level During the Past Week by Subjects With Major Depressive Disorder When They Were Fully Remitted**

| Number of Items/<br>Symptoms | Number of Assessments     |                               |               | Relapse Rate | Range of Number of Items/<br>Symptoms | Relapse Rate Within Range |
|------------------------------|---------------------------|-------------------------------|---------------|--------------|---------------------------------------|---------------------------|
|                              | Relapse (N=73)<br>(14.2%) | No Relapse (N=441)<br>(85.5%) | Total (N=514) |              |                                       |                           |
| 0                            | 14                        | 226                           | 240           | 5.8%         | 0                                     | 14 / 240<br>= 5.8%        |
| 1                            | 12                        | 67                            | 79            | 15.2%        | 1–5                                   | 36 / 219<br>= 16.4%       |
| 2                            | 11                        | 41                            | 52            | 21.2%        |                                       |                           |
| 3                            | 8                         | 37                            | 45            | 17.8%        |                                       |                           |
| 4                            | 3                         | 22                            | 25            | 12.0%        |                                       |                           |
| 5                            | 2                         | 16                            | 18            | 11.1%        |                                       |                           |
| 6                            | 6                         | 7                             | 13            | 46.2%        | 6–9                                   | 15 / 44<br>= 34.1%        |
| 7                            | 5                         | 11                            | 16            | 31.2%        |                                       |                           |
| 8                            | 2                         | 6                             | 8             | 25.0%        |                                       |                           |
| 9                            | 2                         | 5                             | 7             | 28.6%        |                                       |                           |
| 10                           | 5                         | 2                             | 7             | 71.4%        | 10–12                                 | 8 / 11<br>= 72.7%         |
| 11                           | 2                         | 1                             | 3             | 66.7%        |                                       |                           |
| 12                           | 1                         | 0                             | 1             | 100.0%       |                                       |                           |

<sup>a</sup> The 240 assessments in which subjects did not experience any of the 12 symptoms at a moderate or worse level had at low (5.8%) risk of relapse within the next six months, so subjects could safely be scheduled for follow-up six months later (with the understanding that they are to contact the clinician if they experience worsening of symptoms). The 44 assessments in which subjects reported 6-9 of the 12 symptoms had a clinically significant (34.1%) relapse rate and the 11 assessments in which subjects reported 10-12 of the symptoms had a very high (72.7%) relapse rate within the next six months, indicating the need for frequent monitoring. These 3 groups include 295 of the 514 assessments when subjects with major depressive disorder were fully remitted. Thus, the 12-item symptom scale yielded “clinically actionable” information for patient follow-up after 57.4% of the assessments analyzed in this study.
